# Supplementary material for: Control of electron-transfer reduction by protonation of zinc octabutoxyphthalocyanine assisted by intramolecular hydrogen bonding
Source: Royal Society of Chemistry journal article supplement (doi:10.1039/c1cc12710a), 2011-01-01
Supplement: c1cc12710a.pdf [file c1cc12710a.pdf]

## **Electronic Supplementary Information**

**for**

### **Control of electron-transfer reduction by protonation of zinc octabutoxyphthalocyanine assisted by intramolecular hydrogen bonding**

**Tatsuhiko Honda, Takahiko Kojima,\* and Shunichi Fukuzumi\***

## Experimental Section

**Materials.** Chemicals were purchased from commercial sources and used without further purification, unless otherwise noted. Benzonitrile (PhCN) used for spectroscopic and electrochemical measurements was distilled over phosphorus pentoxide prior to use.<sup>1</sup> H<sub>2</sub>(OBU)<sub>8</sub>Pc, Zn(OBU)<sub>8</sub>Pc, and Zn(SBU)<sub>8</sub>Pc, were synthesized according to the reported procedures.<sup>2</sup> [Ru(bpy)<sub>3</sub>](PF<sub>6</sub>)<sub>3</sub> was prepared from tris(2,2'-bipyridyl)ruthenium(II) chloride hexahydrate by the oxidation with PbO<sub>2</sub>.<sup>3</sup>

**Synthesis of [Zn(OBU)<sub>8</sub>PcH](CH<sub>3</sub>COO).** The mixture of Zn(OBU)<sub>8</sub>Pc in CHCl<sub>3</sub> and excess amount of acetic acid was evaporated. The resulting solid was washed with hexane and dried *in vacuo* to give [Zn(OBU)<sub>8</sub>PcH](CH<sub>3</sub>COO) as red-brown powder quantitatively. Elemental analysis (%) calcd for C<sub>66</sub>H<sub>84</sub>N<sub>8</sub>O<sub>10</sub>Zn•(H<sub>2</sub>O)<sub>0.5</sub>: C 64.77, H 7.00, N 9.16; found: C 64.66, H 6.79, N 9.13.

**Spectroscopic Measurements.** UV-vis spectroscopy was carried out on a Shimadzu UV-3100PC spectrometer or a Hewlett Packard 8453 diode array spectrometer at room temperature using 1 cm cells. Equilibrium constants (log *K*) of the protonated phthalocyanines [Equation (1)] were determined by the Hill equation [Equation (2)], which analyzes changes of absorption spectra during the titration as a function of the concentration of added acids.<sup>4</sup>

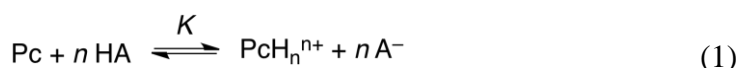

$$\log [(A_o - A_i)/(A_f - A_o)] = n \log [\text{HA}] + \log K \quad (2)$$

, where *A*<sub>o</sub> is observed absorbance, *A*<sub>i</sub> is an absorbance of Pc, *A*<sub>f</sub> is an absorbance of PcH<sub>n</sub><sup>n+</sup>, *n* is a number of proton to react, and [HA] denotes the concentration of acid, respectively.

<sup>1</sup>H NMR spectra were recorded on a JEOL A-300 spectrometer and chemical shifts were determined relative to the residual solvent peaks. The fluorescence spectra were measured by using an absolute PL quantum yield measurement system (Hamamatsu photonics Co., Ltd., C9920-02) by excitation at 430 nm. Phosphorescence spectrum was measured by using a SPEX Fluorolog τ3 spectrophotometer.

The energy levels of singlet excited states of Zn(II)-phthalocyanines were determined on the basis of the averaged values (in eV) of their absorption and fluorescence maxima.

The energy levels of their tripled excited states were calculated by using the emission maxima of their phosphorescence spectra.

**Time-Resolved Transient Absorption Measurements.** Nanosecond time-resolved transient absorption measurements were performed using a laser system provided by UNISOKU Co., Ltd. Measurements of nanosecond transient absorption spectra were performed according to the following procedure. A deaerated solution was excited by a Panther optical parametric oscillator pumped by a Nd:YAG laser (Continuum, SLII-10, 4-6 ns fwhm) at  $\lambda = 430$  nm. The photodynamics was monitored by continuous exposure to a xenon lamp (150 W) as a probe light and a photomultiplier tube (Hamamatsu 2949) as a detector. The equilibrium constant of monoprotection at the triplet excited state ( $K^*$ ) was determined from the observed rate constant of triplet decay by using Equation (3),<sup>5</sup>

$$(k_{\text{obs}} - k_1)/(k_2 - k_{\text{obs}}) = K^* [\text{HA}] \quad (3)$$

where  $k_{\text{obs}}$  is the observed rate constant of the decay of the triplet excited state,  $k_1$  is rate constant of that of  $\text{Zn}(\text{OBU})_8\text{Pc}$ ,  $k_2$  is rate constant of that of  $\text{Zn}(\text{OBU})_8\text{PcH}^+$ , and  $[\text{HA}]$  denotes the concentration of acid.

**Electrochemical Measurements.** Cyclic voltammetry (CV) was performed on an ALS 630B electrochemical analyzer and was conducted in deaerated PhCN containing 0.1 M  $[(n\text{-Bu})_4\text{N}]\text{PF}_6$  (TBAPF<sub>6</sub>) as a supporting electrolyte at room temperature. A conventional three-electrode cell was used with a platinum working electrode (surface area of 0.3 mm<sup>2</sup>) and a platinum wire as the counter electrode. The Pt working electrode (BAS) was routinely polished with BAS polishing alumina suspension and rinsed with acetone before use. The potentials were measured with respect to the Ag/AgNO<sub>3</sub> (0.01 M) reference electrode. All potentials (vs. Ag/Ag<sup>+</sup>) were converted to values vs. SCE by adding 0.29 V.<sup>6</sup> All electrochemical measurements were carried out under an atmospheric pressure of nitrogen.

## References

- 1 W. L. F. Armarego and C. L. L. Chai, *Purification of Laboratory Chemicals, 5th ed.*, Butterworth-Heinemann, Oxford, 2003.
- 2 N. Kobayashi, H. Ogata, N. Nonaka and E. A. Luk'yanets, *Chem. Eur. J.* 2003, **9**, 5123.
- 3 R. E. DeSimone and R. S. Drago, *J. Am. Chem. Soc.* 1970, **92**, 2343.

- 4 (a) P. E. Ellis, J. E. Linard, T. Szymanski, R. D. Jones, J. R. Budge and F. Basolo, *J. Am. Chem. Soc.* 1980, **102**, 1889; (b) A. V. Hill, *J. Physiol (London)* 1910, **40**, iv.
- 5 A. Beeby, S. Fitzgerald and C. F. Stanley, *J. Chem. Soc. Perkin Trans. 2* 2001, 1978.
- 6 C. K. Mann and K. K. Barnes, *Electrochemical Reactions in Non-aqueous Systems*, MerceL Dekker, New York, 1970.

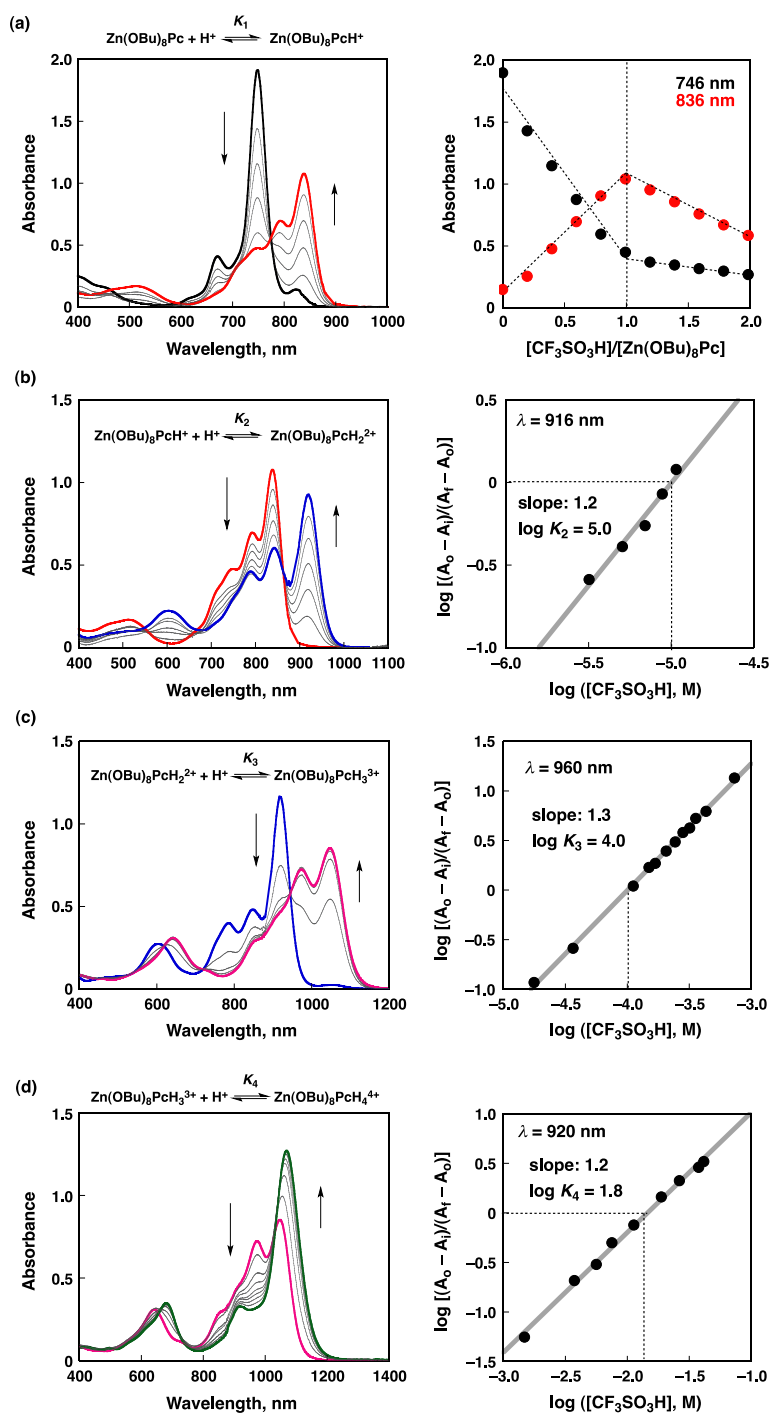

**Fig. S1** Left column: Absorption spectral change in the course of titration of  $\text{Zn(OBu)}_8\text{Pc}$  ( $1.0 \times 10^{-5}$  M) in PhCN with  $\text{CF}_3\text{SO}_3\text{H}$ . Right column: (a) Absorbance changes at 746 (black) and 836 nm (red). A Hill plot to determine the stoichiometry and the formation constant; (b)  $\log K_2$ , (c)  $\log K_3$ , and (d)  $\log K_4$ .

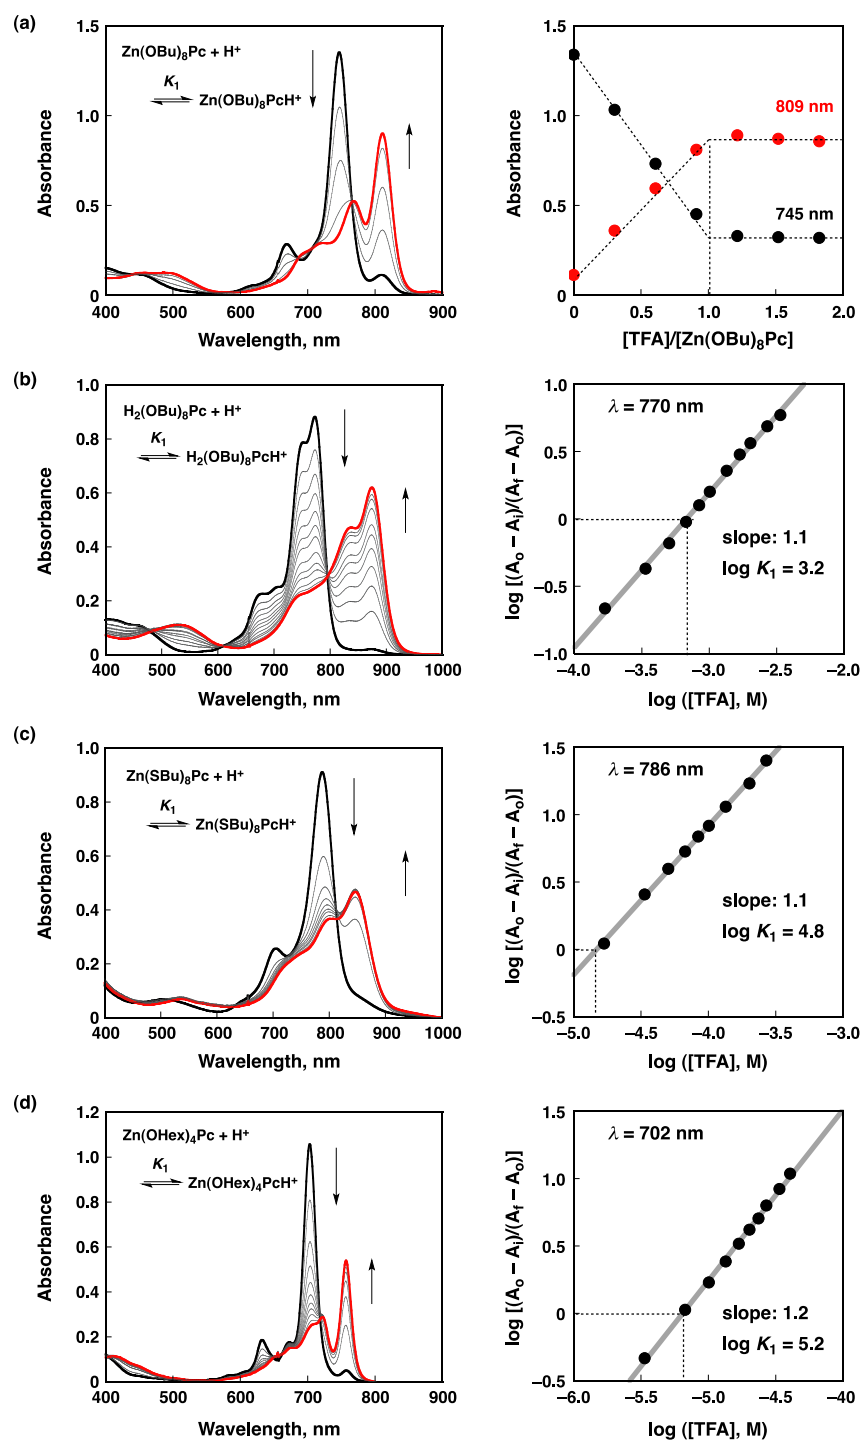

**Fig. S2** Left column: Absorption spectral change in the course of titration of (a)  $\text{Zn(OBu)}_8\text{Pc}$ , (b)  $\text{H}_2(\text{OBu})_8\text{Pc}$ , and (c)  $\text{Zn(SBu)}_8\text{Pc}$  in PhCN with TFA. Right column: (a) Absorbance changes at 745 (black) and 809 nm (red). A Hill plot to determine the stoichiometry and the formation constant ( $\log K_1$ ) of (b)  $\text{H}_2(\text{OBu})_8\text{PcH}^+$ , and (c)  $\text{Zn(SBu)}_8\text{PcH}^+$ .

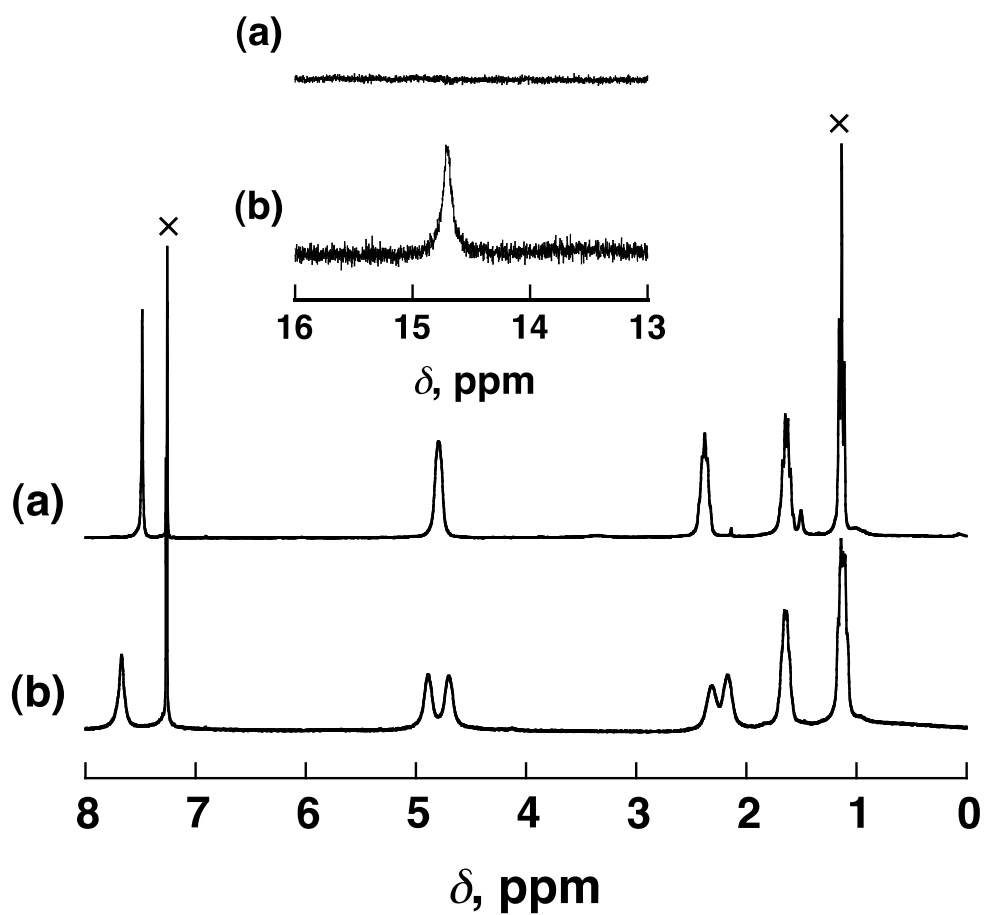

**Fig. S3**  $^1\text{H}$  NMR spectra of (a)  $\text{Zn}(\text{OBu})_8\text{Pc}$  and (b)  $\text{Zn}(\text{OBu})_8\text{Pc}$  with 2 equiv of TFA in  $\text{CDCl}_3$  at 243 K. The symbol  $\times$  denotes the signal derived from solvent molecules.

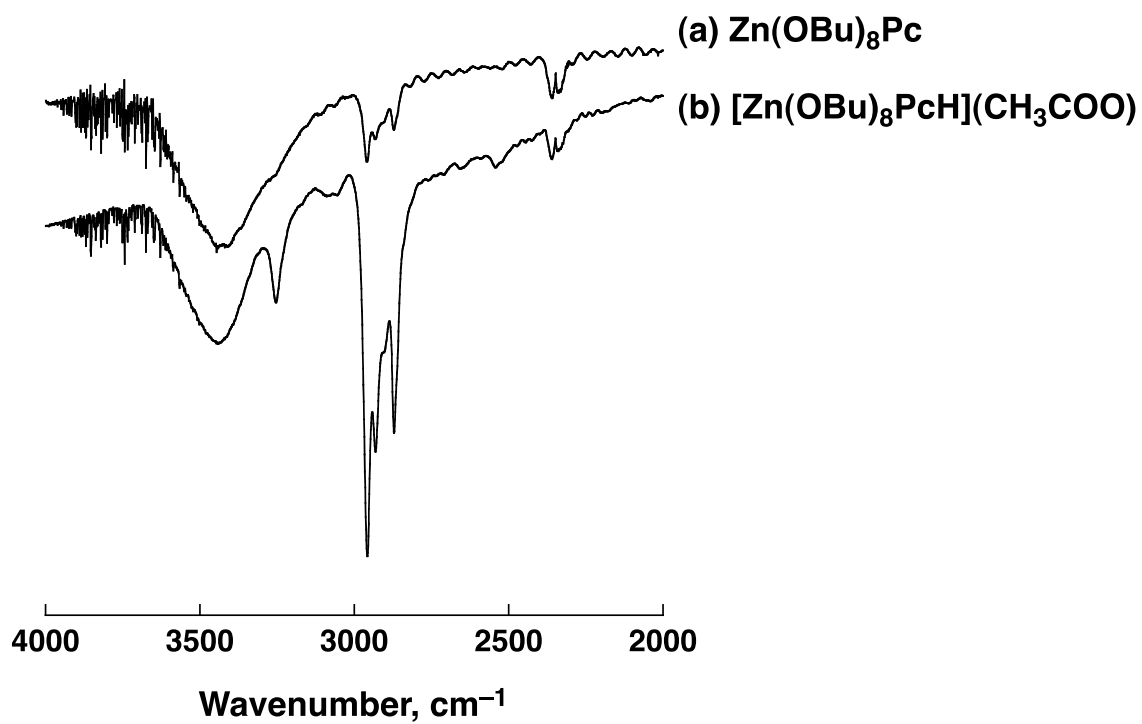

**Fig. S4** IR spectra (in KBr pellet) of (a) Zn(OBu)<sub>8</sub>Pc and (b) [Zn(OBu)<sub>8</sub>PcH](CH<sub>3</sub>COO).



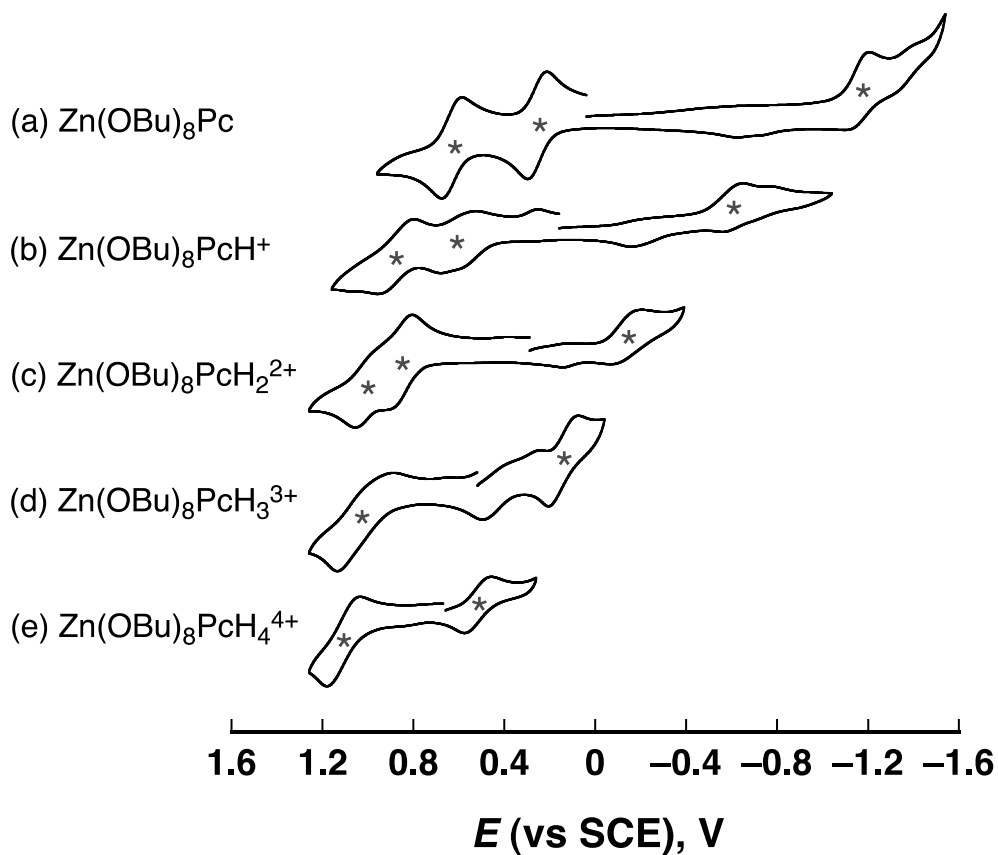

**Fig. S5** Cyclic voltammograms of (a)  $\text{Zn(OBu)}_8\text{Pc}$ , (b)  $\text{Zn(OBu)}_8\text{PcH}^+$  ( $[\text{CF}_3\text{SO}_3\text{H}] = 2.5 \times 10^{-3} \text{ M}$ ), (c)  $\text{Zn(OBu)}_8\text{PcH}_2^{2+}$  ( $[\text{CF}_3\text{SO}_3\text{H}] = 5.0 \times 10^{-3} \text{ M}$ ), (d)  $\text{Zn(OBu)}_8\text{PcH}_3^{3+}$  ( $[\text{CF}_3\text{SO}_3\text{H}] = 1.0 \times 10^{-2} \text{ M}$ ), and (e)  $\text{Zn(OBu)}_8\text{PcH}_4^{4+}$  ( $[\text{CF}_3\text{SO}_3\text{H}] = 2.5 \times 10^{-2} \text{ M}$ ) in PhCN. The concentration of  $\text{Zn(OBu)}_8\text{Pc}$  is  $2.5 \times 10^{-3} \text{ M}$ . Measurements were performed under  $\text{N}_2$  at room temperature in the presence of 0.1 M  $[(n\text{-Bu})_4\text{N}]\text{PF}_6$  as an electrolyte. Asterisk indicates the center of the redox couple.

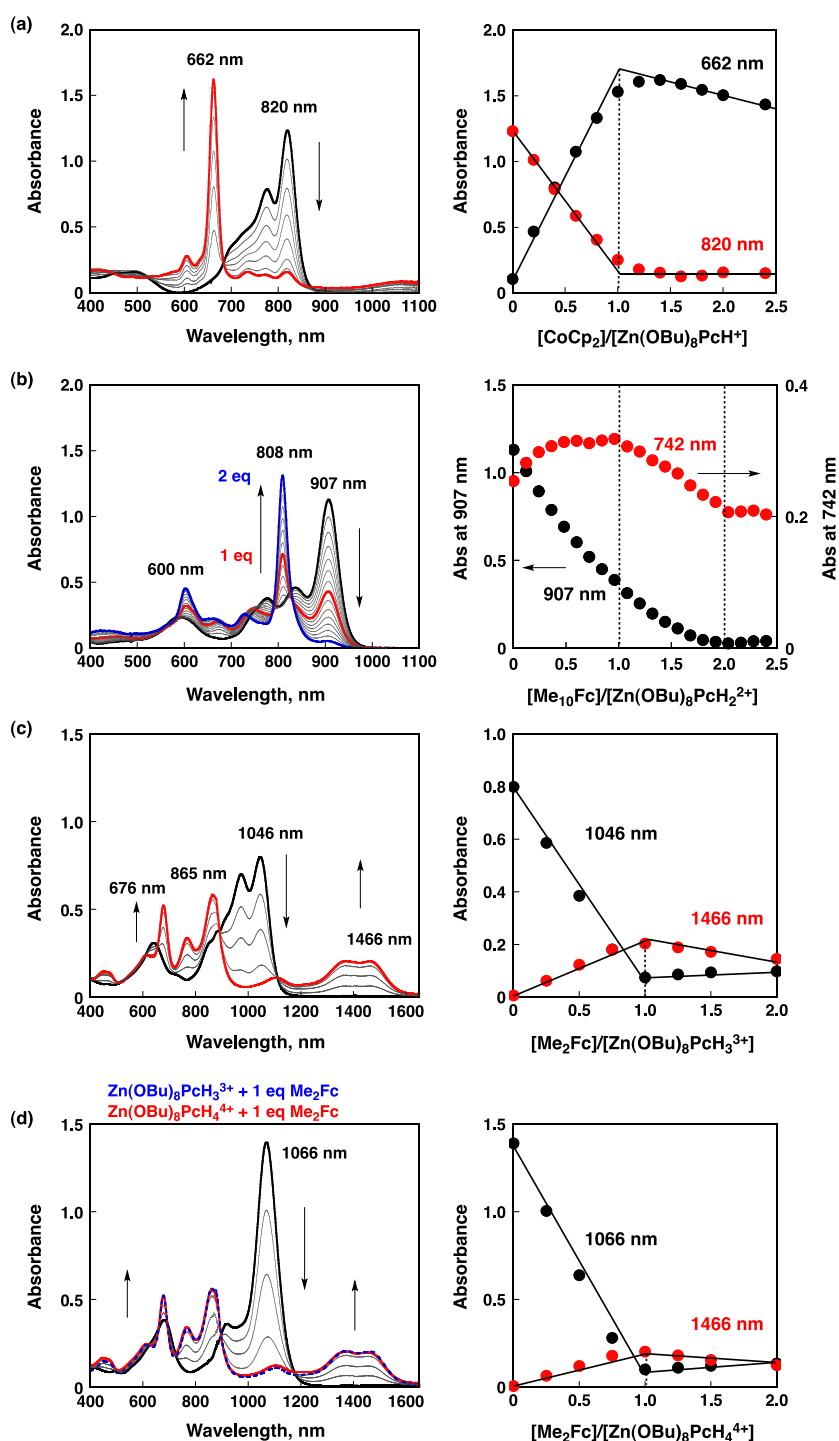

**Fig. S6** Absorption spectral change in the course of titration of (a)  $\text{Zn(OBu)}_8\text{PcH}^+$  ( $[\text{Benzoic acid}] = 2.0 \times 10^{-4} \text{ M}$ ) with cobaltocene ( $\text{CoCp}_2$ ), (b)  $\text{Zn(OBu)}_8\text{PcH}_2^{2+}$  ( $[\text{TFA}] = 1.0 \times 10^{-3} \text{ M}$ ) with decamethylferrocene ( $\text{Me}_{10}\text{Fc}$ ), (c)  $\text{Zn(OBu)}_8\text{PcH}_3^{3+}$  ( $[\text{CF}_3\text{SO}_3\text{H}] = 2.0 \times 10^{-4} \text{ M}$ ) with 1,1'-dimethylferrocene ( $\text{Me}_2\text{Fc}$ ), (d)  $\text{Zn(OBu)}_8\text{PcH}_4^{4+}$  ( $[\text{CF}_3\text{SO}_3\text{H}] = 1.0 \times 10^{-2} \text{ M}$ ) with  $\text{Me}_2\text{Fc}$  in PhCN. The concentration of  $\text{Zn(OBu)}_8\text{Pc}$  is  $1.0 \times 10^{-5} \text{ M}$ .

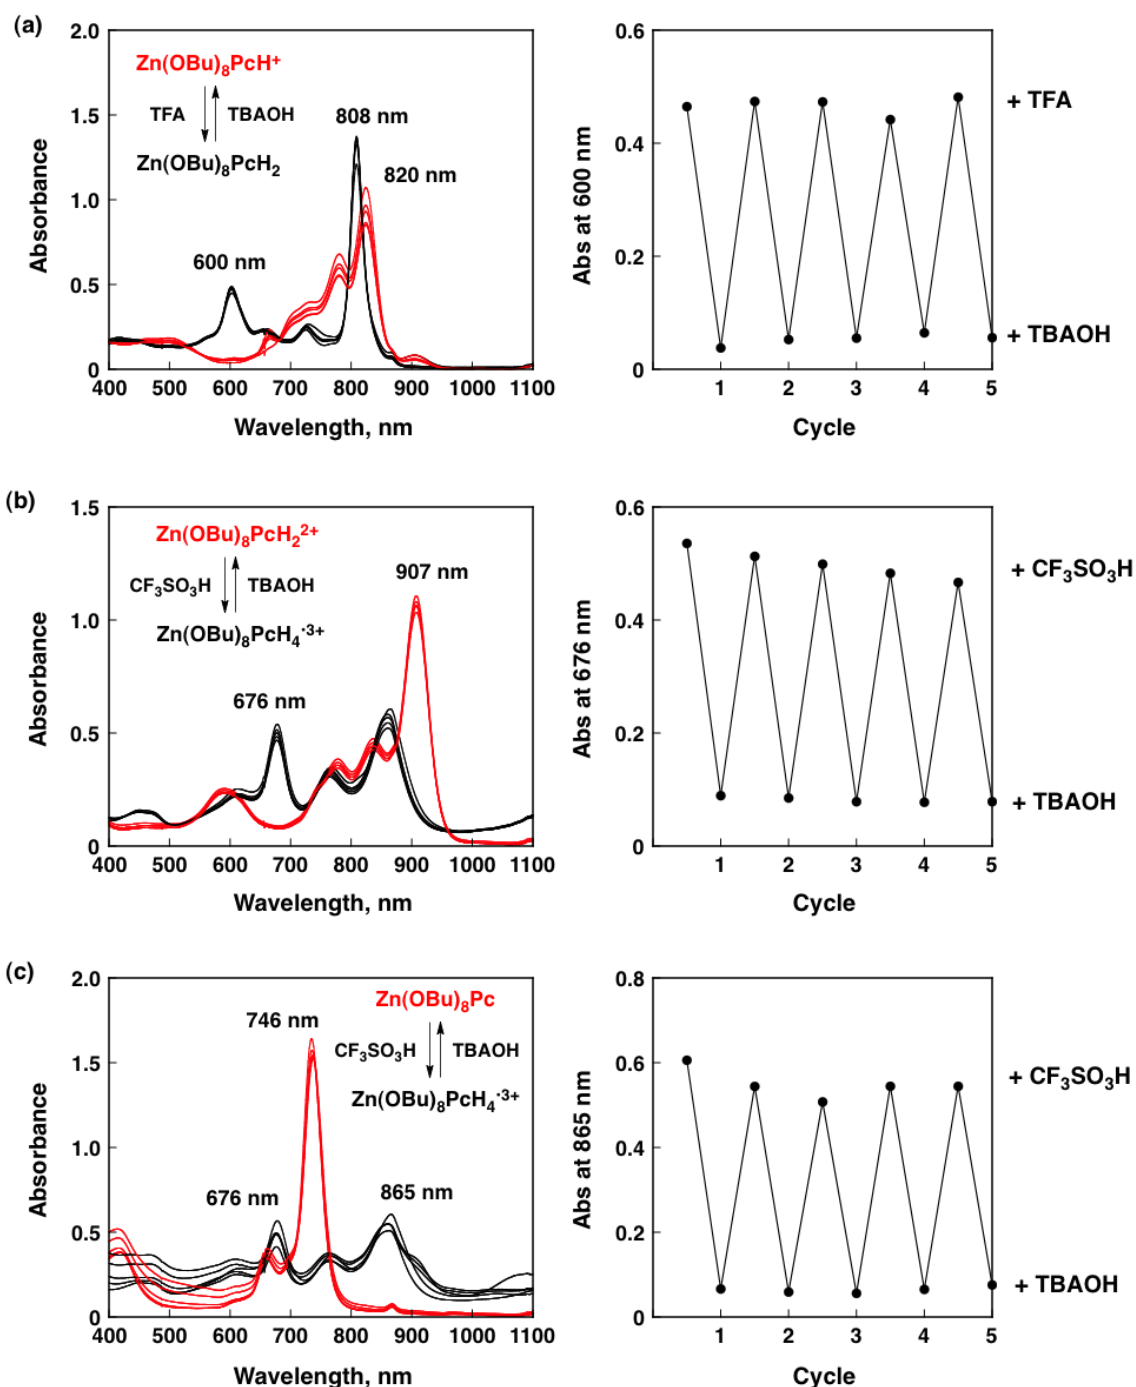

**Fig. S7** Cyclical absorption spectral change in the course of alternate addition of (a) TBAOH ( $1.0 \times 10^{-3}$  M) and TFA ( $1.0 \times 10^{-3}$  M) to a solution of  $\text{Zn(OBu)}_8\text{PcH}_2$  ( $1.0 \times 10^{-5}$  M), (b) TBAOH ( $2.0 \times 10^{-4}$  M) and  $\text{CF}_3\text{SO}_3\text{H}$  ( $2.0 \times 10^{-4}$  M) to a solution of  $\text{Zn(OBu)}_8\text{PcH}_4^{3+}$  ( $1.0 \times 10^{-5}$  M), and (c) TBAOH ( $1.0 \times 10^{-2}$  M) and  $\text{CF}_3\text{SO}_3\text{H}$  ( $1.0 \times 10^{-2}$  M) to a solution of  $\text{Zn(OBu)}_8\text{PcH}_4^{3+}$  ( $1.0 \times 10^{-5}$  M) in PhCN under Ar flow.

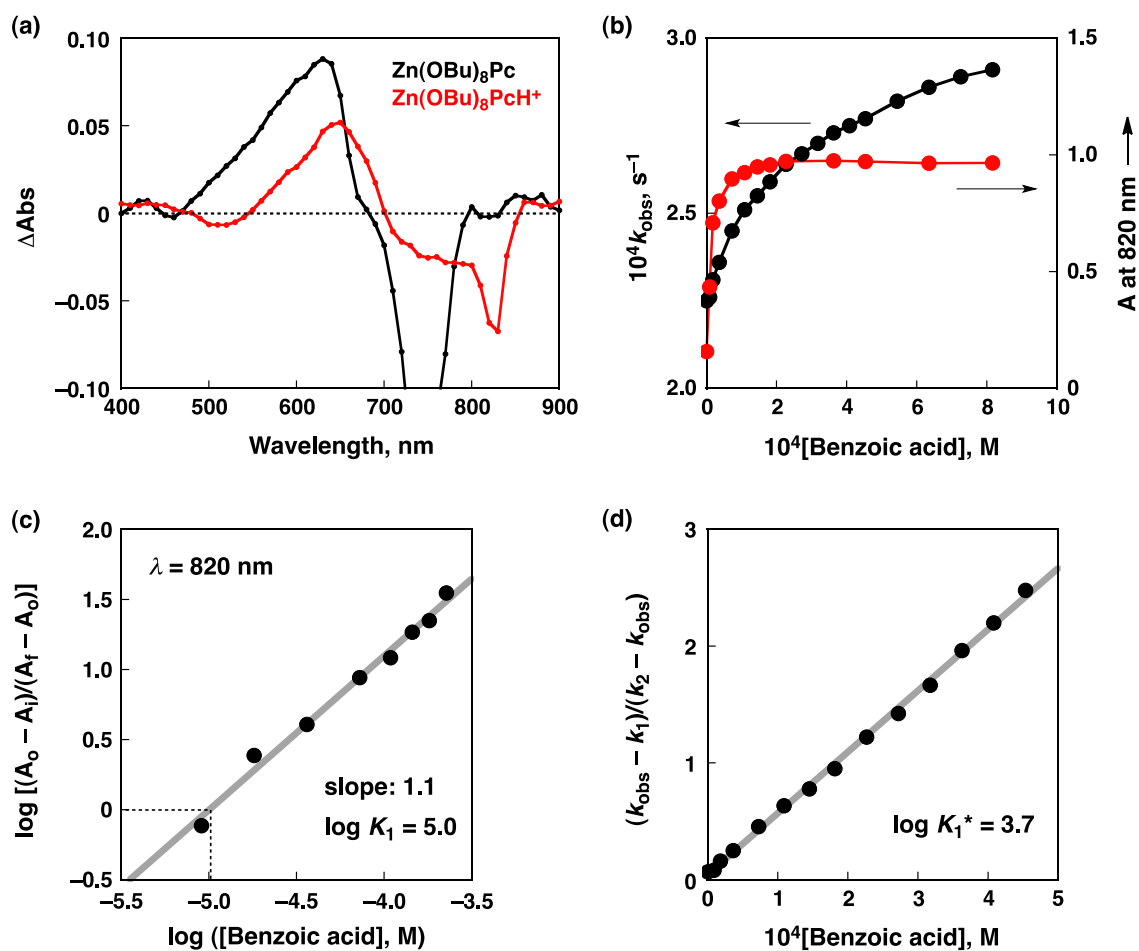

**Fig. S8** (a) Nanosecond transient absorption spectra of Zn(OBu)<sub>8</sub>Pc (black) and Zn(OBu)<sub>8</sub>PcH<sup>+</sup> (red, [TFA] =  $1.0 \times 10^{-5}$  M) in PhCN with photoirradiation at 430 nm. The concentration of Zn(OBu)<sub>8</sub>Pc is  $1.0 \times 10^{-5}$  M. (b) The observed rate constant at 650 nm (black, left) and absorbance changes at 820 nm (red, right) upon addition of benzoic acid to a PhCN solution of Zn(OBu)<sub>8</sub>Pc ( $1.0 \times 10^{-5}$  M). (c) A Hill plot to determine the stoichiometry and the formation constant ( $\log K_1$ ). (d) A plot to determine the formation constant of monoprotontion at the triplet excited state ( $\log K_1^*$ ).

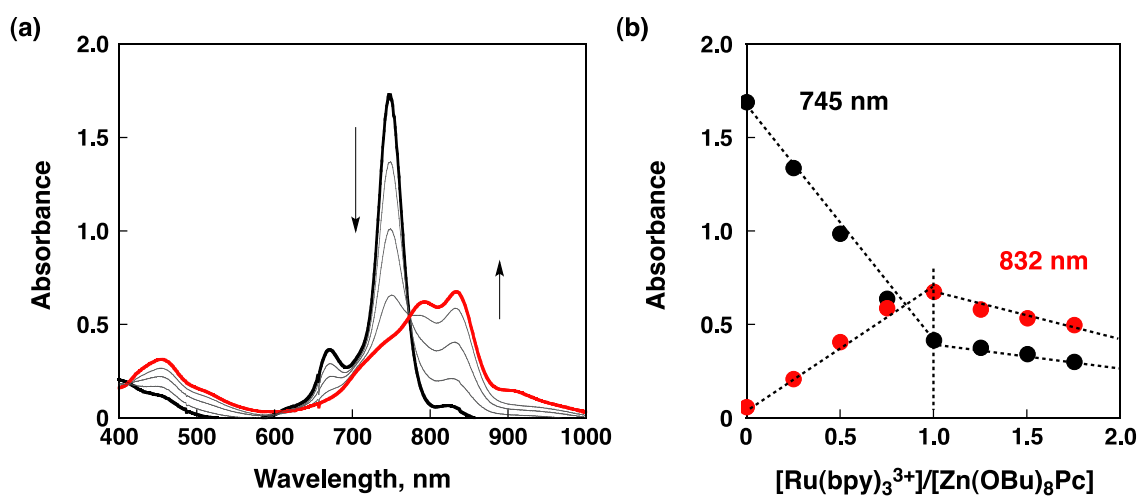

**Fig. S9** (a) Absorption spectral change in the course of titration of Zn(OBu)<sub>8</sub>Pc (1.0 × 10<sup>-5</sup> M) with [Ru(bpy)<sub>3</sub>](PF<sub>6</sub>)<sub>3</sub> in PhCN. (b) Absorbance changes at 745 (black) and 832 nm (red).

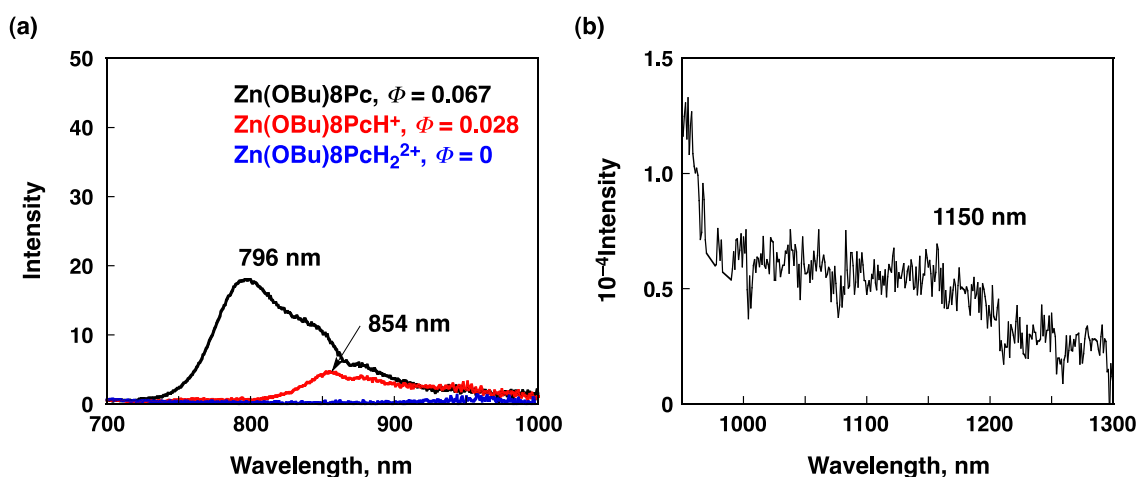

**Fig. S10** (a) Fluorescence spectra of Zn(OBu)<sub>8</sub>Pc (black), Zn(OBu)<sub>8</sub>PcH<sup>+</sup> (red, [TFA] = 1.0 × 10<sup>-5</sup> M), and Zn(OBu)<sub>8</sub>PcH<sub>2</sub><sup>2+</sup> (blue, [TFA] = 1.0 × 10<sup>-4</sup> M) in PhCN photoirradiated at 430 nm ([Zn(OBu)<sub>8</sub>Pc] = 1.0 × 10<sup>-5</sup> M). (b) Phosphorescence spectrum of Zn(OBu)<sub>8</sub>PcH<sup>+</sup> ([Zn(OBu)<sub>8</sub>Pc] = 1.0 × 10<sup>-5</sup> M, [TFA] = 1.0 × 10<sup>-5</sup> M) in 2-MeTHF at 77 K with photoirradiation at 450 nm.

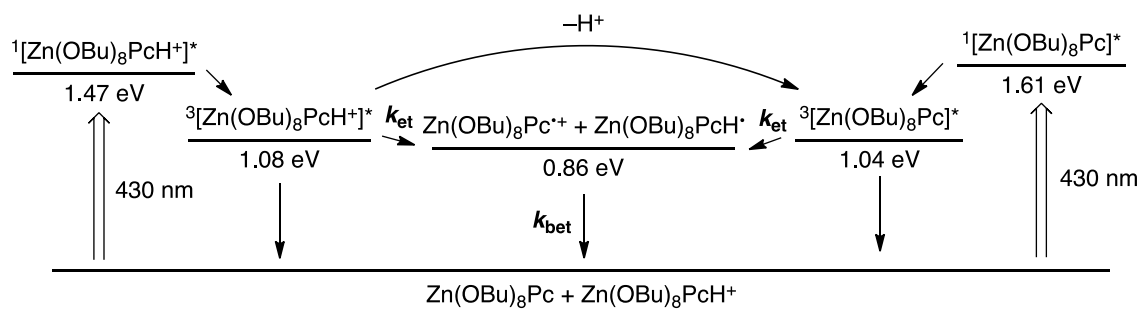

**Scheme S1** Energy diagram of intermolecular photoinduced electron transfer and back electron transfer in a mixture of  $\text{Zn(OBu)}_8\text{Pc}$  and  $\text{Zn(OBu)}_8\text{PcH}^+$  in PhCN.
